# Supplementary material for: Influence of dielectric layer thickness and roughness on topographic effects in magnetic force microscopy
Source: publisher site journal article supplement (doi:10.3762/bjnano.10.106), 2019-05-17
Supplement: Additional file 1 [file 2190-4286-10-106-S1.pdf]

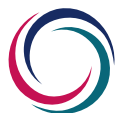

## Supporting Information

for

### **Influence of dielectric layer thickness and roughness on topographic effects in magnetic force microscopy**

Alexander Krivcov, Jasmin Ehrler, Marc Fuhrmann, Tanja Junkers and Hildegard Möbius

*Beilstein J. Nanotechnol.* **2019**, *10*, 1056–1064. doi:10.3762/bjnano.10.106

## Additional experimental details

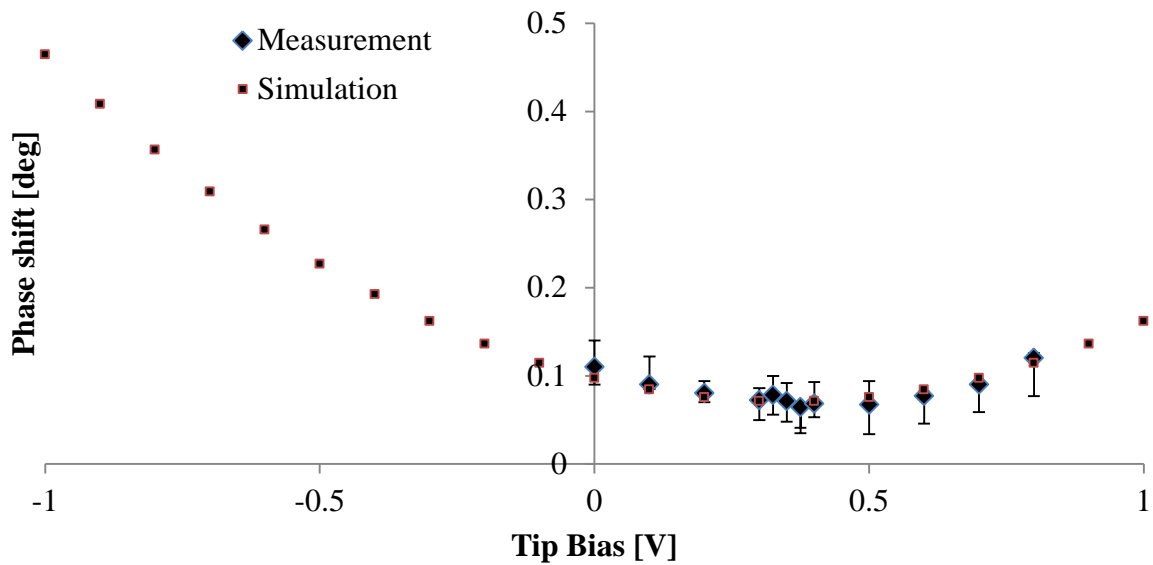

**Figure S1:** Measured and simulated EFM curve for silicon substrate with ASYMFM-HM tip taken at 20 nm lift height. The contact potential difference between the tip and the substrate is determined to be  $0.35 \pm 0.05$  V.

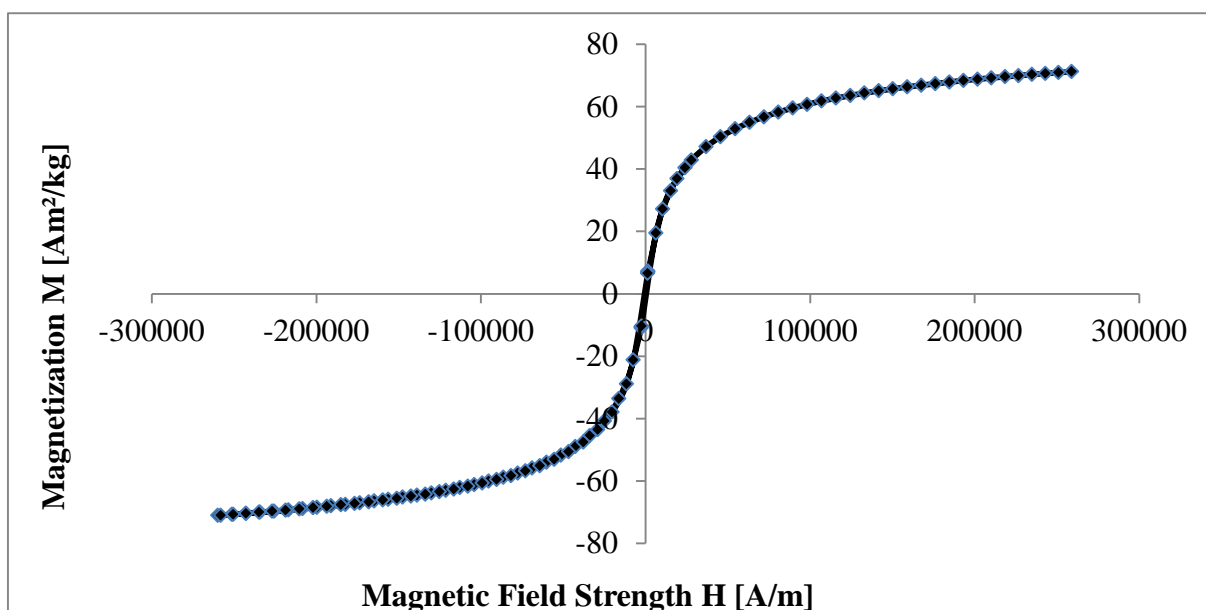

**Figure S2:** Vibrating sample magnetometer (VSM) measurement of superparamagnetic iron oxide nanoparticles (SPIONs) with 10 nm diameter.

**Table S1:** Layer thickness for resist with different degree of dilutions at 3000 rpm rotation speed.

| dilution<br>resist/thinner | layer thickness<br>[nm] |
|----------------------------|-------------------------|
| 1:1                        | 380 ± 12                |
| 6:7                        | 300 ± 10                |
| 5:7                        | 245 ± 8                 |
| 4:7                        | 200 ± 5                 |
| 3:7                        | 165 ± 3                 |
| 2:7                        | 90 ± 2                  |
| 1:7                        | 25 ± 1                  |
